# Supplementary material for: Design, Synthesis, and Biological Evaluation of Pyridineamide Derivatives Containing a 1,2,3-Triazole Fragment as Type II c-Met Inhibitors
Source: MDPI journal article supplement (doi:10.3390/molecules25010010), 2019-12-18
Supplement: s1 [file s1]

## Supplementary Materials:

# Design, Synthesis and Biological Evaluation of Pyridineamide Derivatives Containing 1,2,3-triazole Fragment as Type II c-Met Inhibitors

Hehua Xiong <sup>1,†</sup>, Jianxin Cheng <sup>1,†</sup>, Jianqing Zhang <sup>1</sup>, Qian Zhang <sup>1</sup>, Zhen Xiao <sup>1</sup>, Han Zhang <sup>1</sup>, Qidong Tang <sup>1,\*</sup> and Pengwu Zheng <sup>1,\*</sup>

### Content

<sup>1</sup>H-NMR spectra of all target compounds B1, B6, B12, B13, B20, B25 and B26 (Figure 1-7).

<sup>13</sup>C-NMR spectra of compound B6, B7, B10, B11, B14, B25 and B26 (Figure 8-14).

TOF MS spectra of compound B13, B17, B19, B21, B22 and B25 (Figure 15-20).

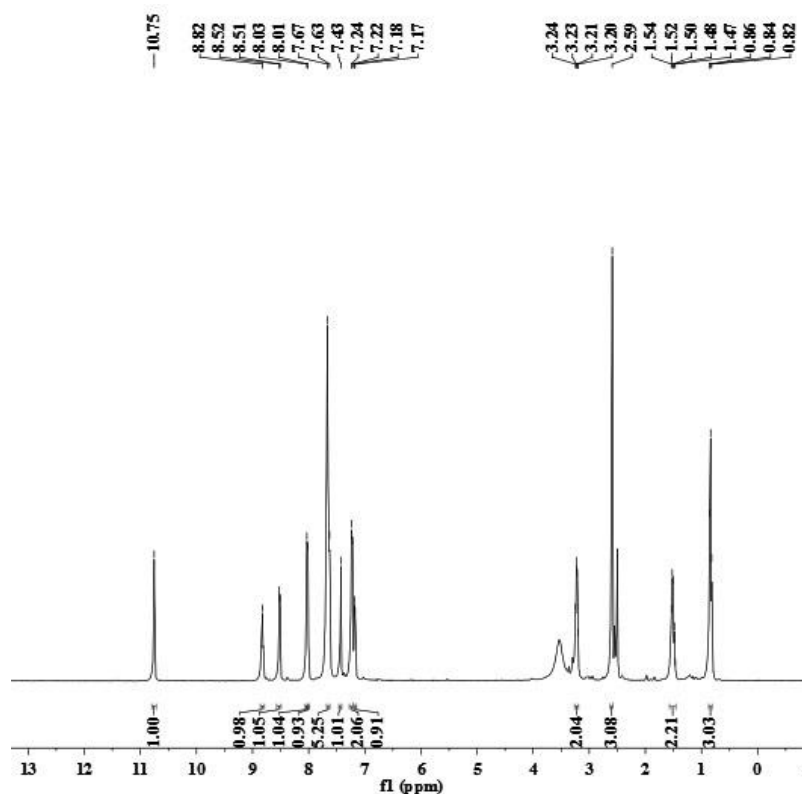

**Figure 1.** <sup>1</sup>H-NMR spectrum of compound B1

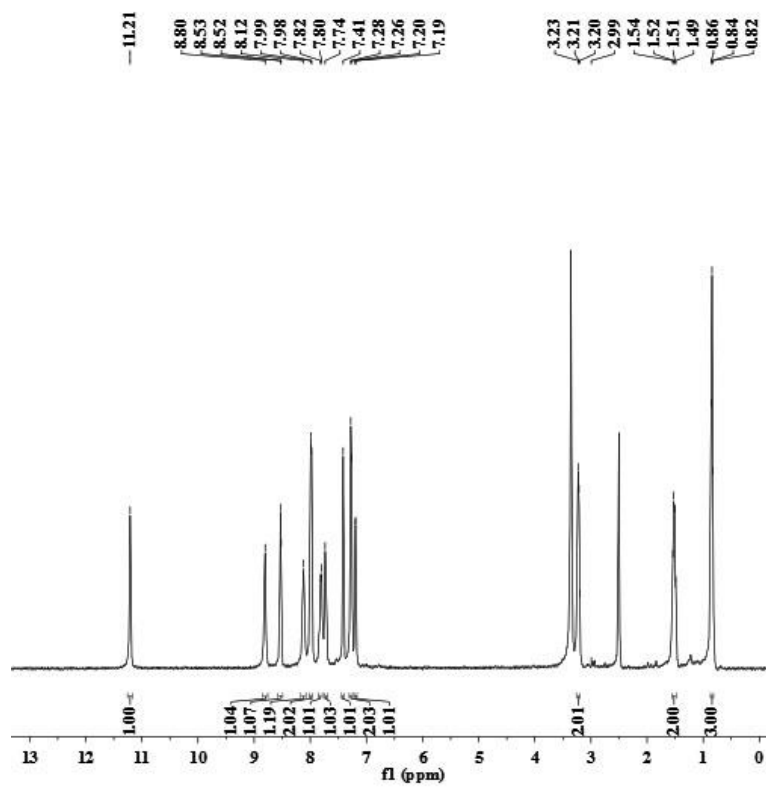

Figure 2. <sup>1</sup>H-NMR spectrum of compound B6

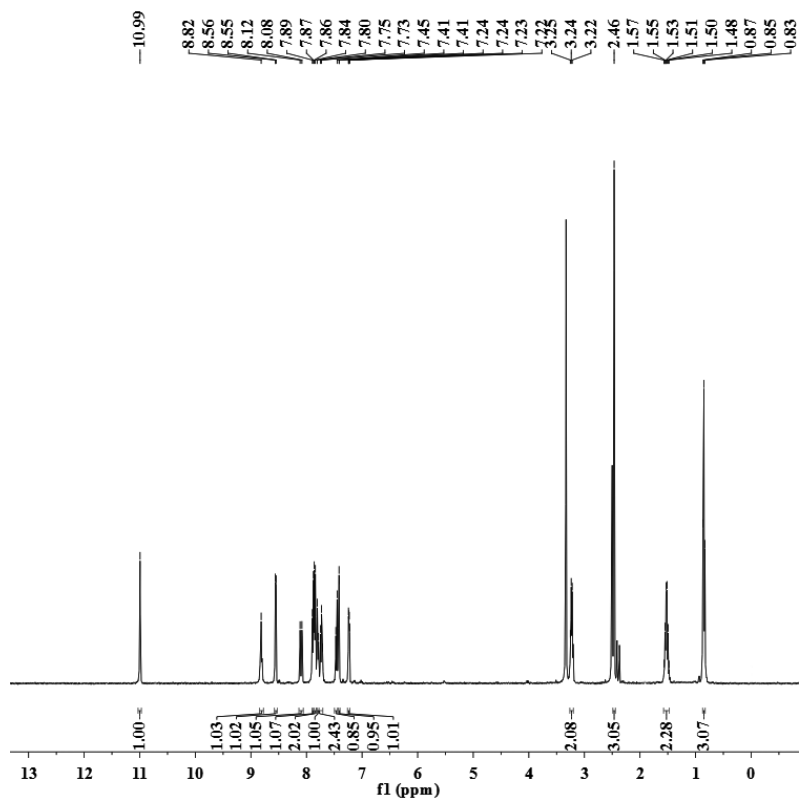

Figure 3. <sup>1</sup>H-NMR spectrum of compound B12

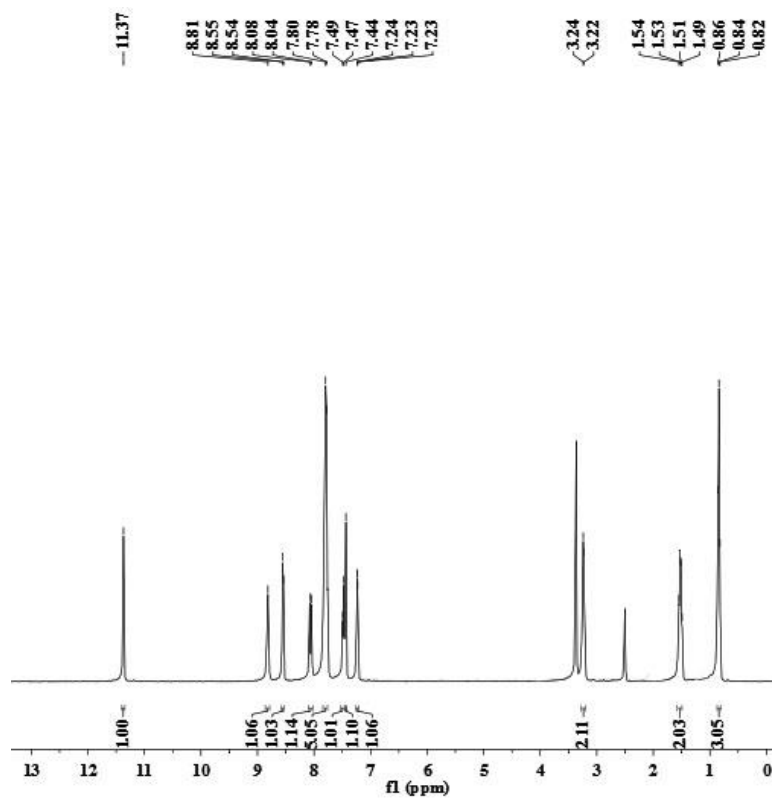

Figure 4. <sup>1</sup>H-NMR spectrum of compound B13

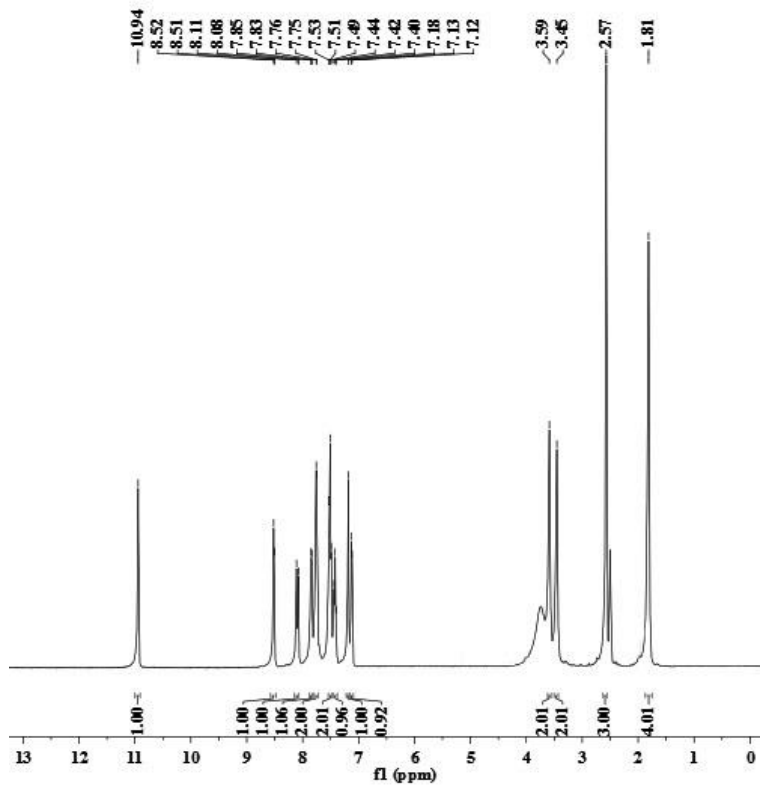

Figure 5. <sup>1</sup>H-NMR spectrum of compound B20

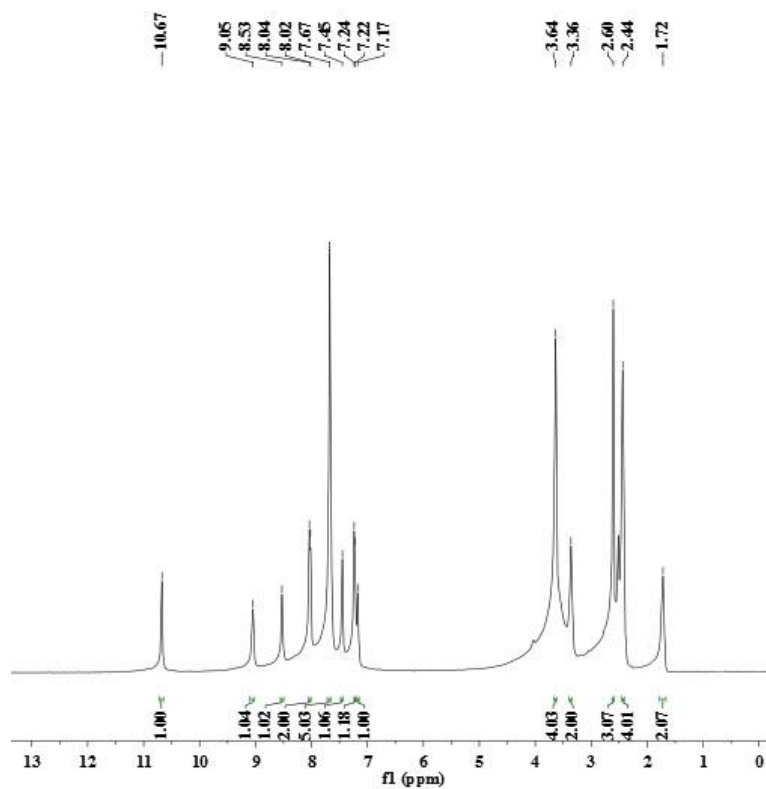

Figure 6. <sup>1</sup>H-NMR spectrum of compound B25

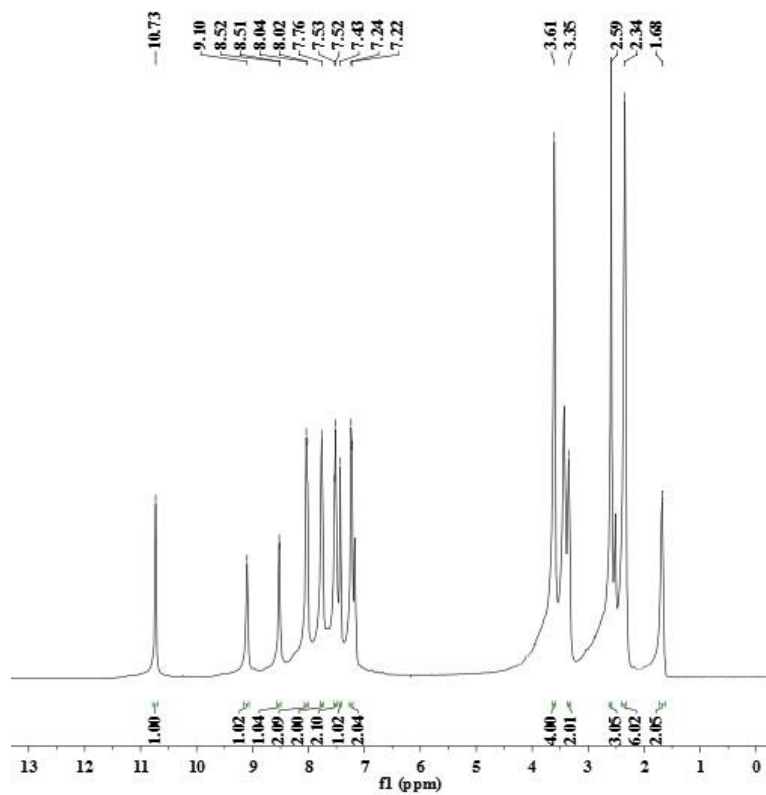

Figure 7. <sup>1</sup>H-NMR spectrum of compound B26

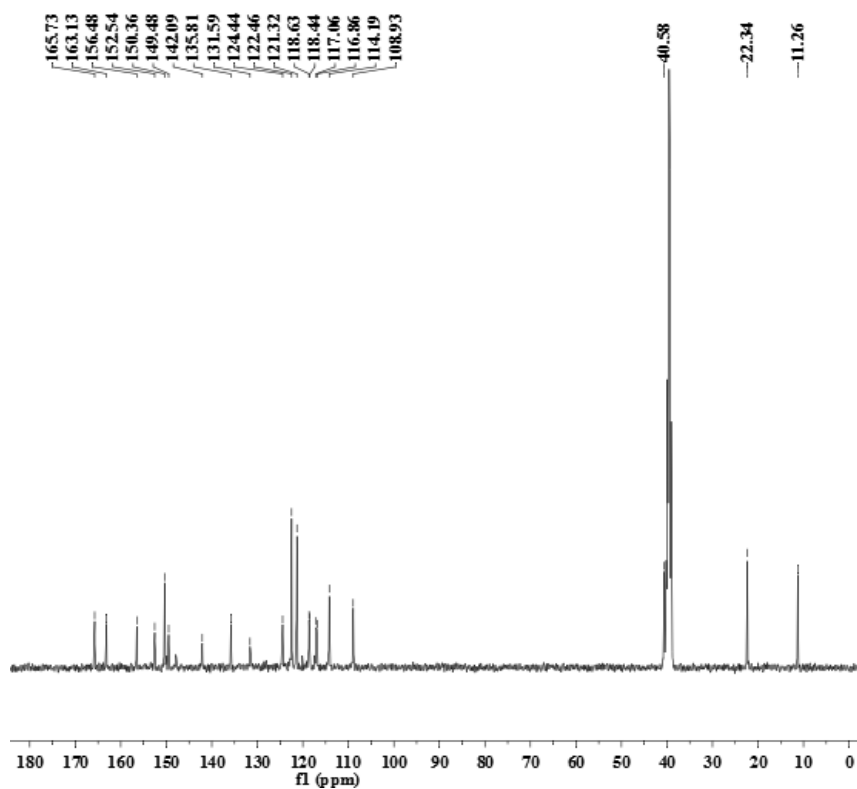

**Figure 8.**  $^{13}\text{C}$ -NMR spectrum of compound **B6**

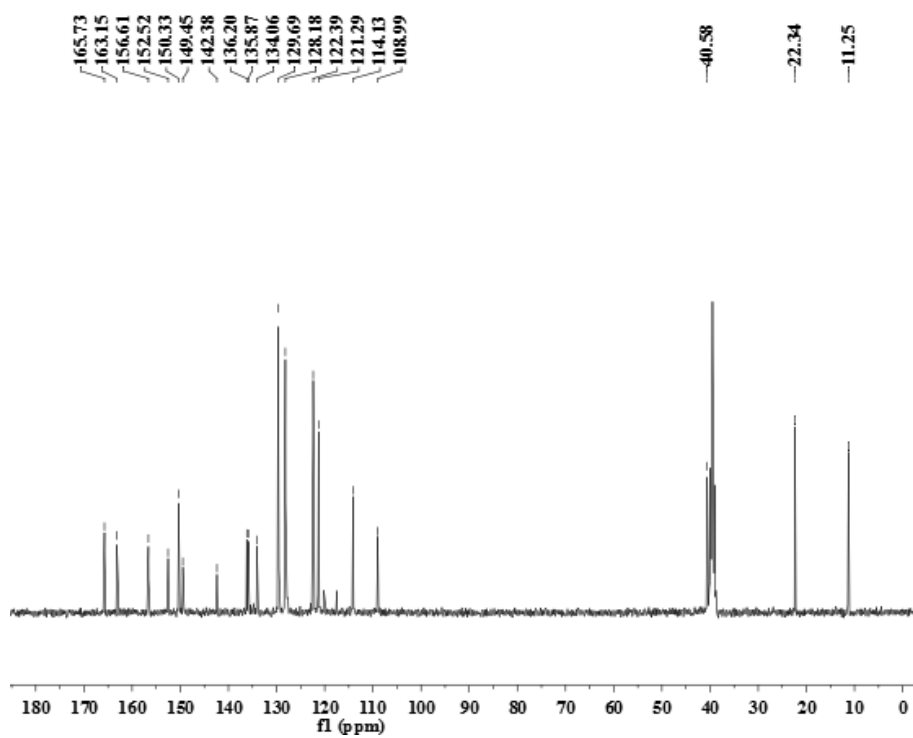

**Figure 9.**  $^{13}\text{C}$ -NMR spectrum of compound **B7**

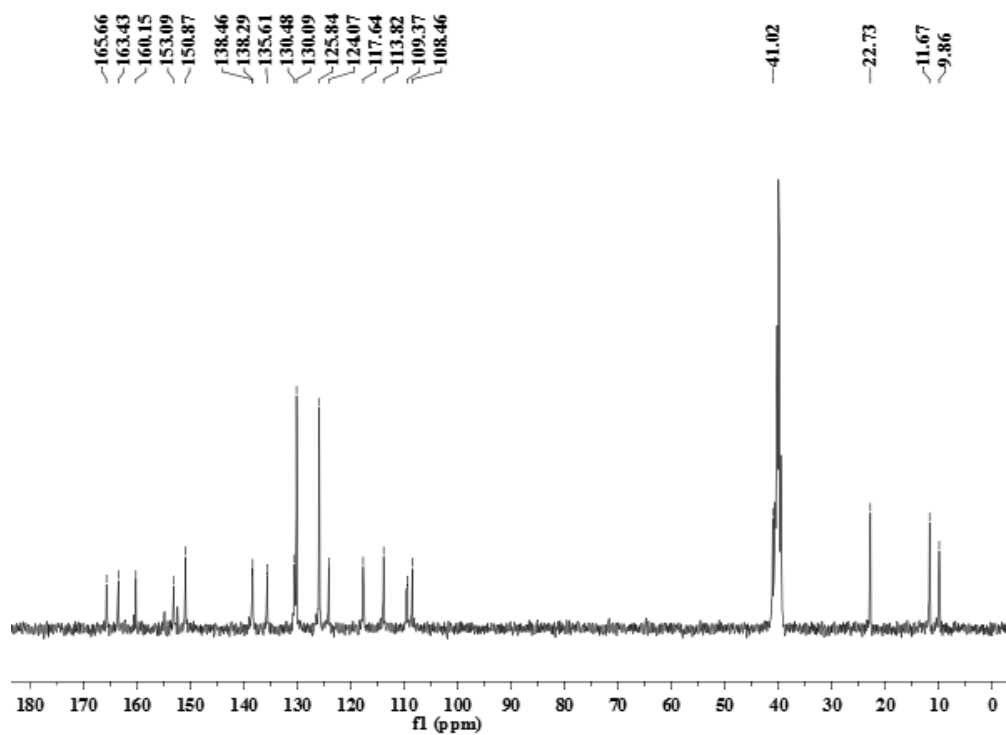

Figure 10.  $^{13}\text{C}$ -NMR spectrum of compound B10

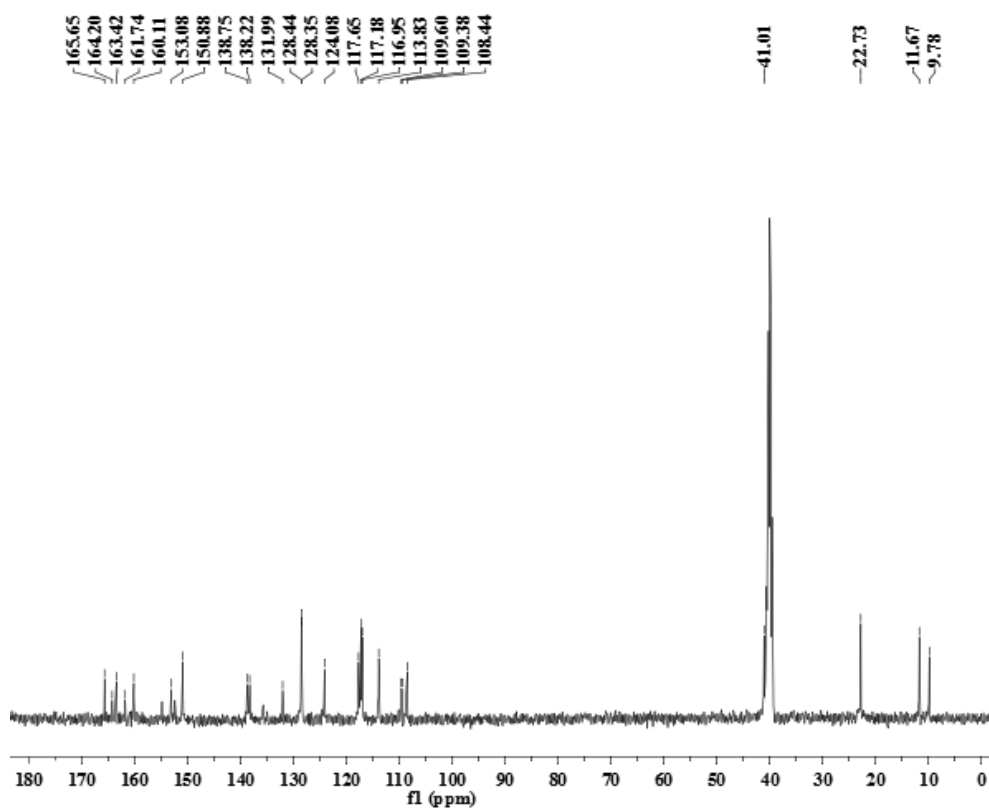

Figure 11.  $^{13}\text{C}$ -NMR spectrum of compound B11

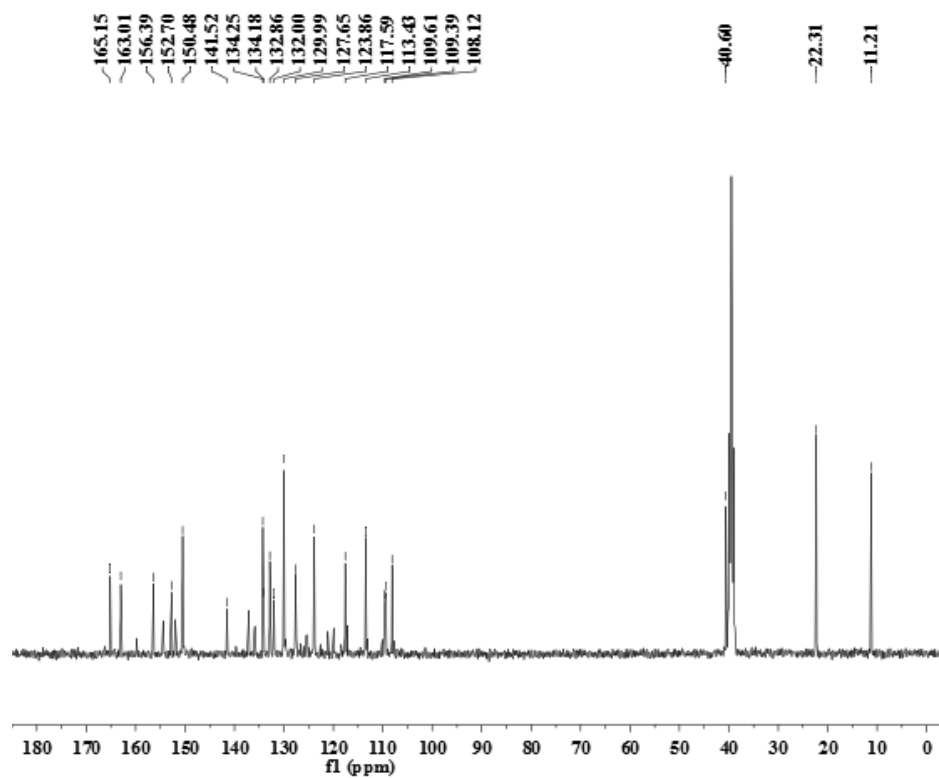

Figure 12.  $^{13}\text{C}$ -NMR spectrum of compound B14

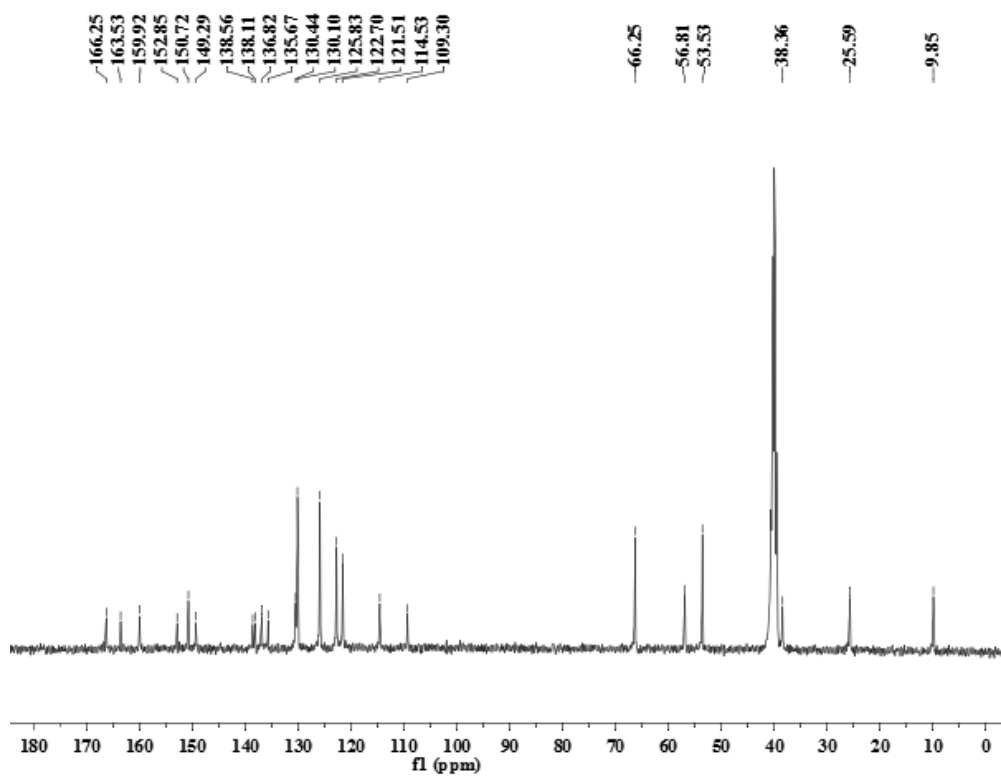

Figure 13.  $^{13}\text{C}$ -NMR spectrum of compound B25

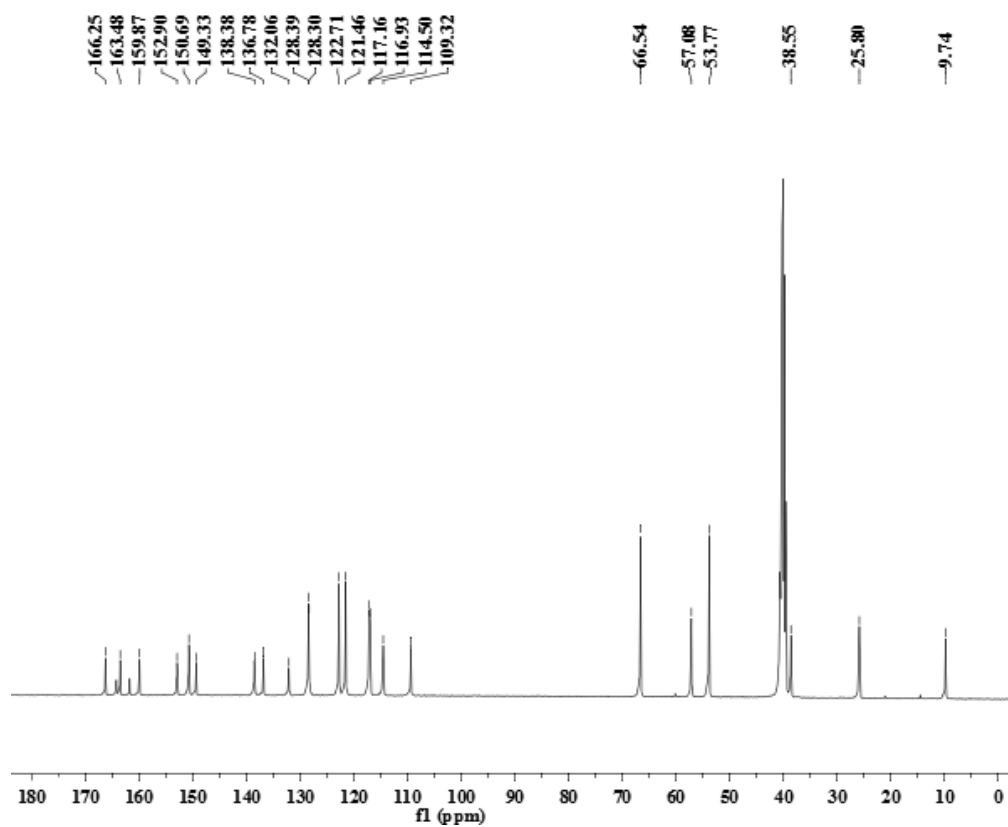

**Figure 14.**  $^{13}\text{C}$ -NMR spectrum of compound B26



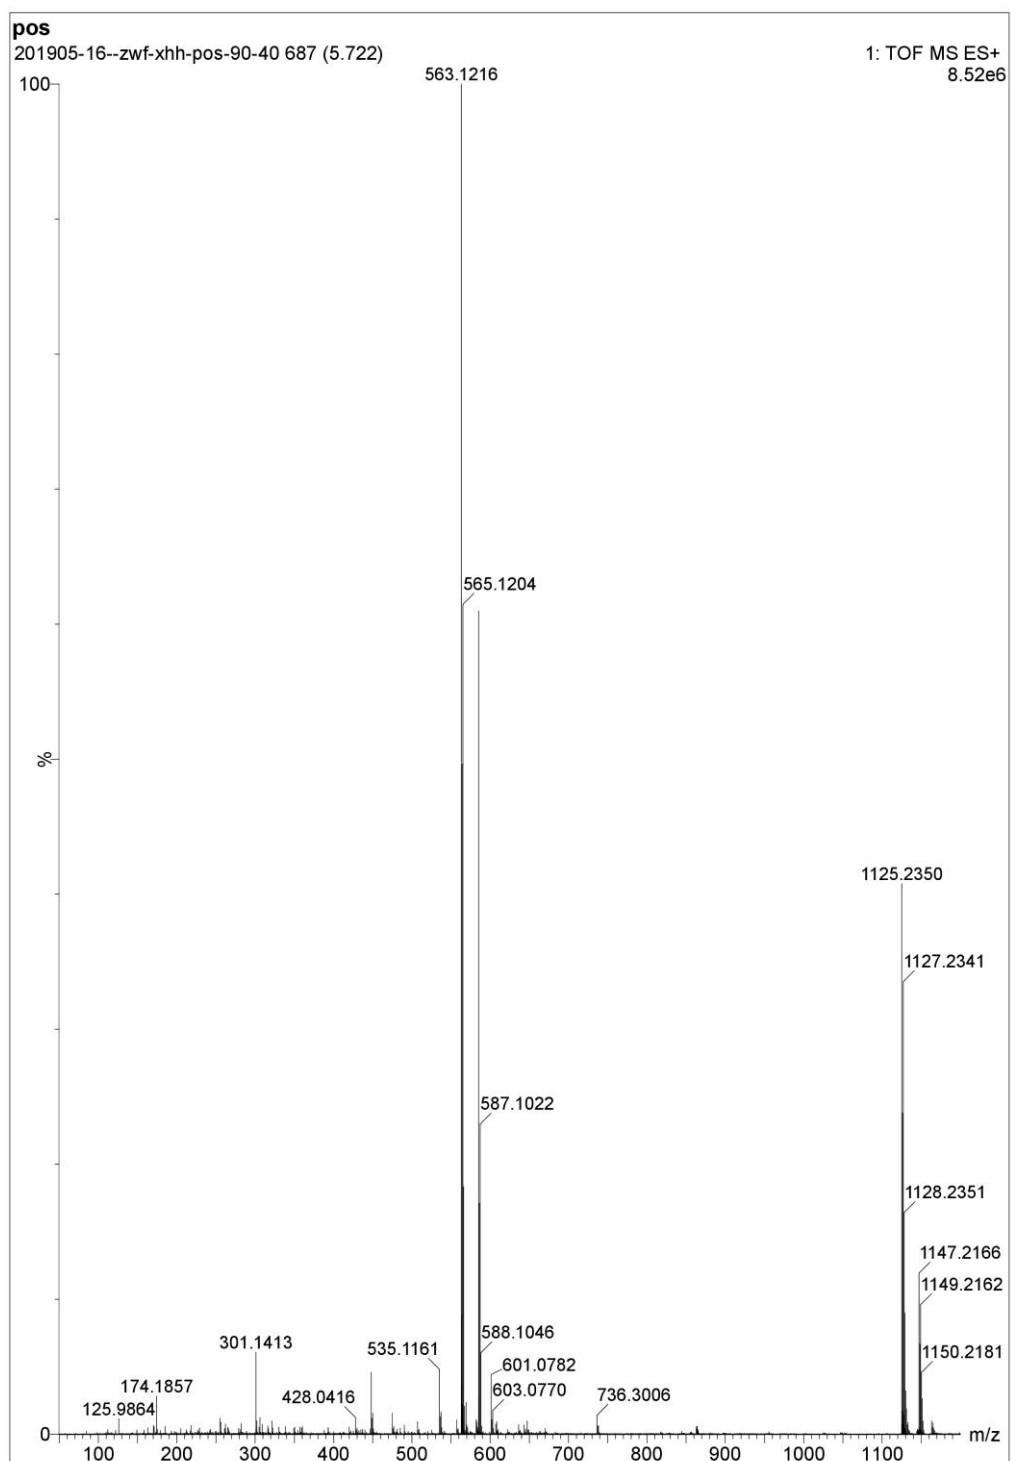

**Figure 15.** TOF MS of compound **B13**.

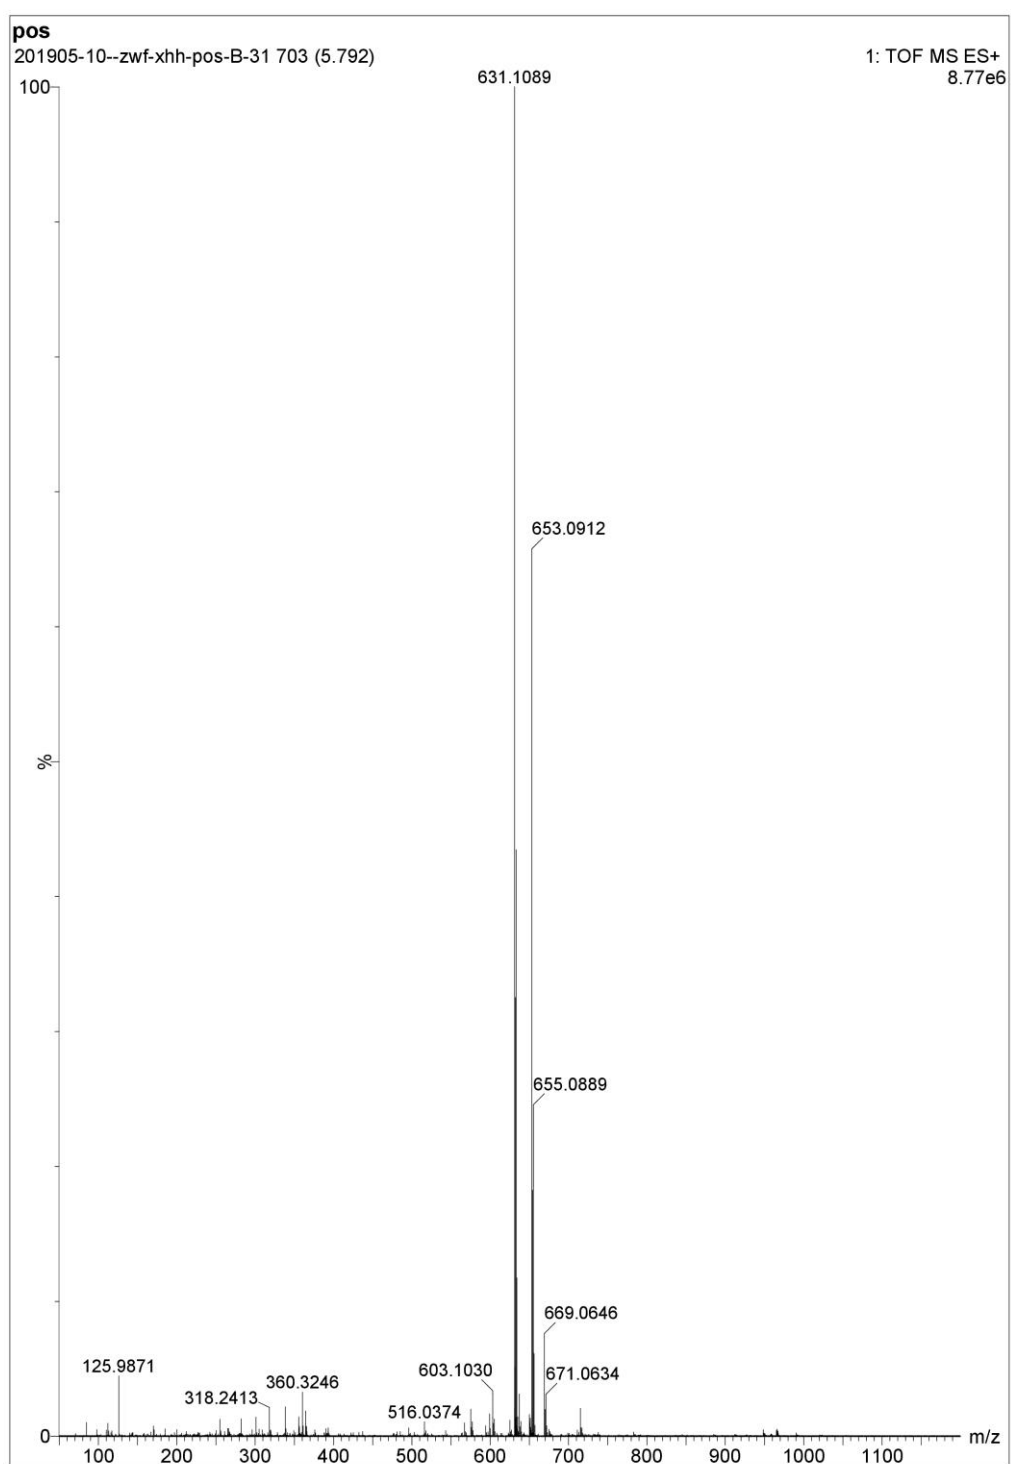

**Figure 16.** TOF MS of compound **B17**.

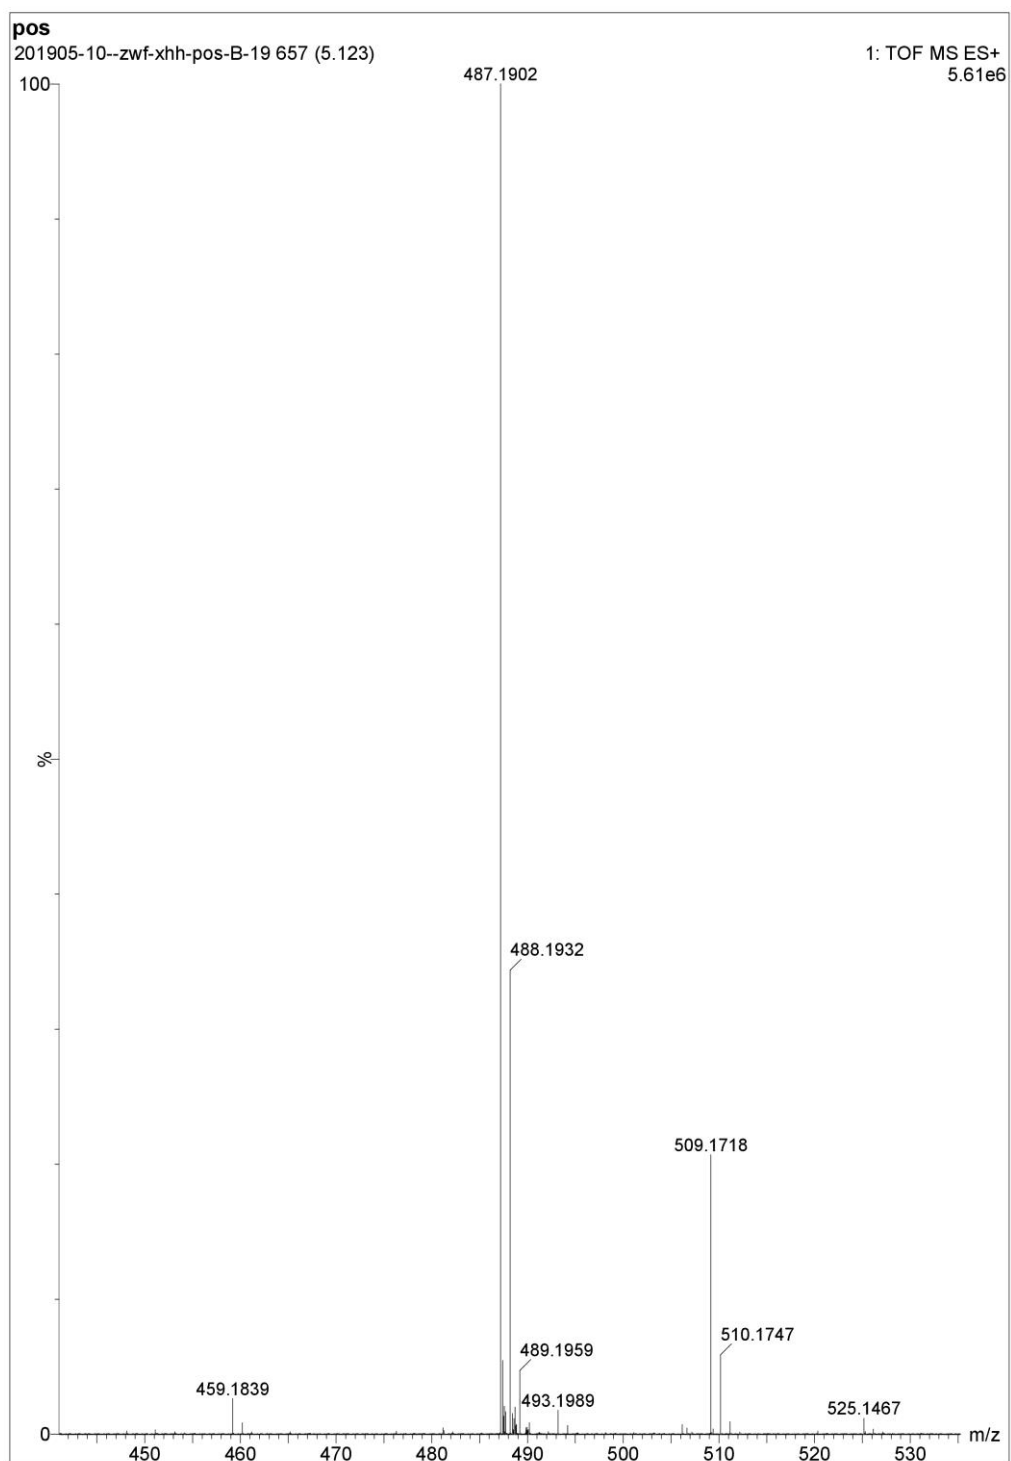

**Figure 17.** TOF MS of compound **B19**

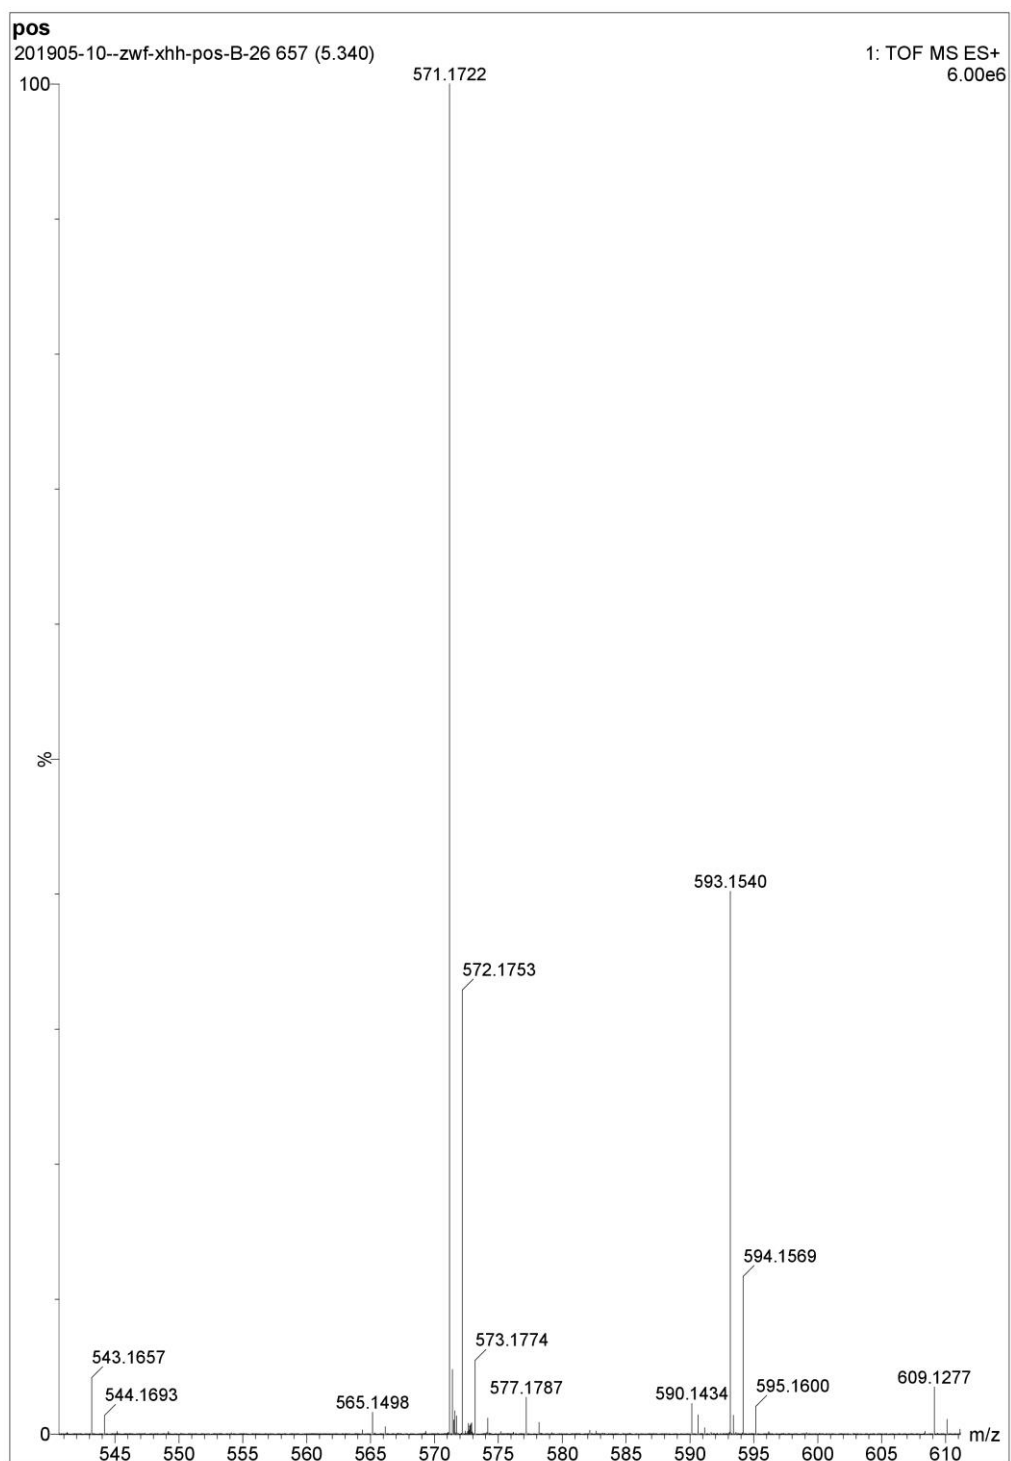

**Figure 18.** TOF MS of compound **B21**.

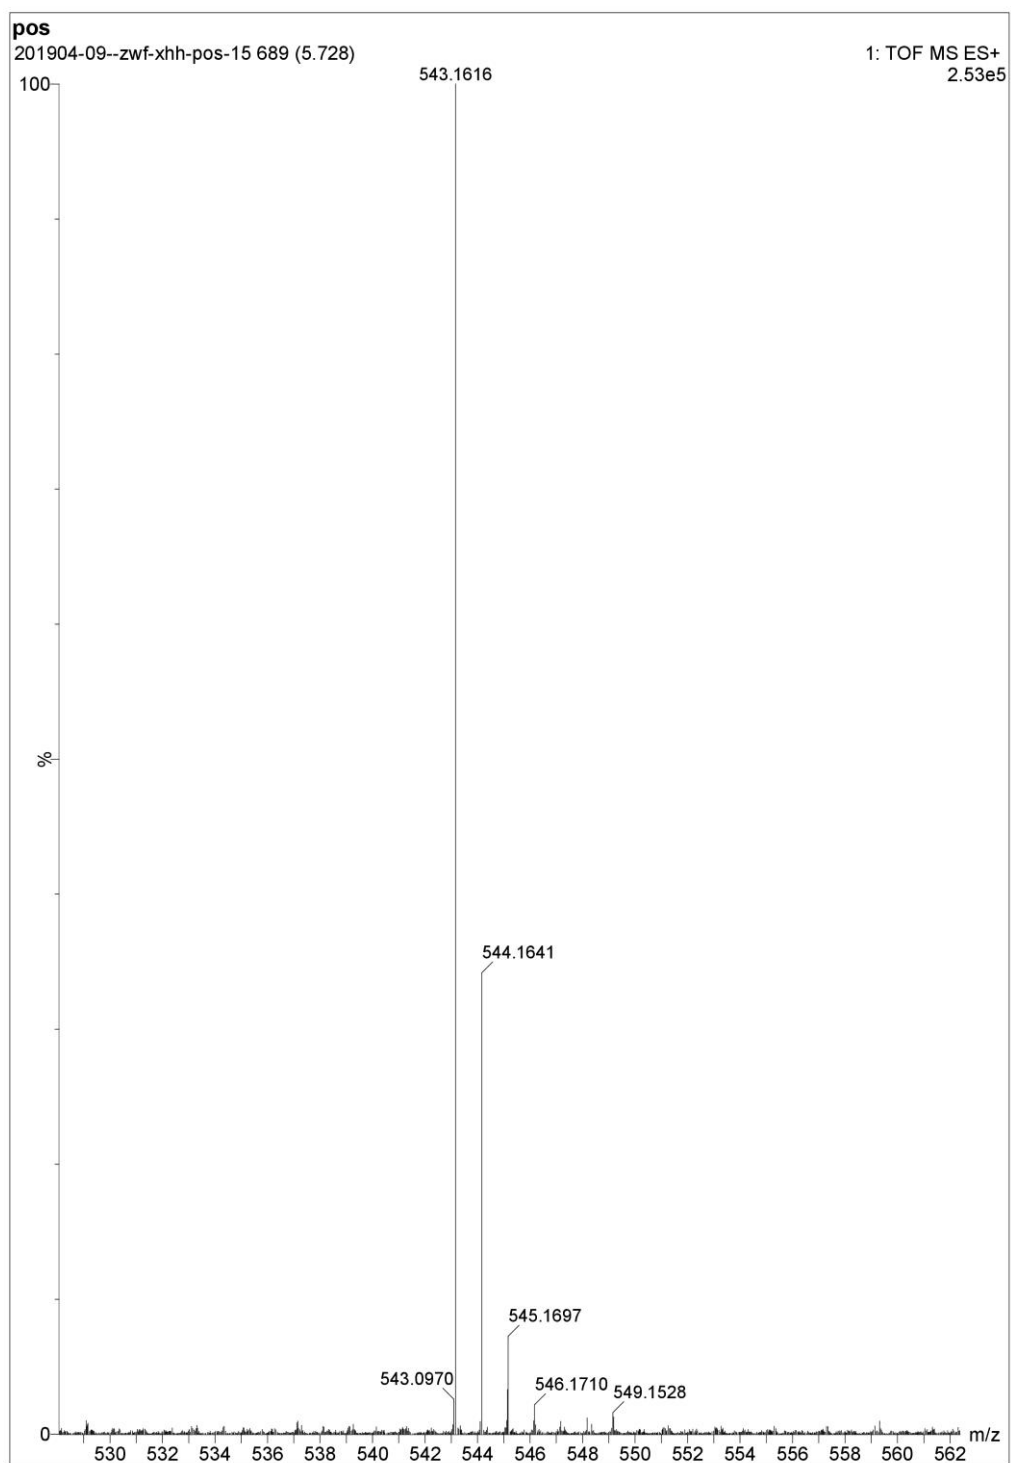

**Figure 19.** TOF MS of compound **B22**.

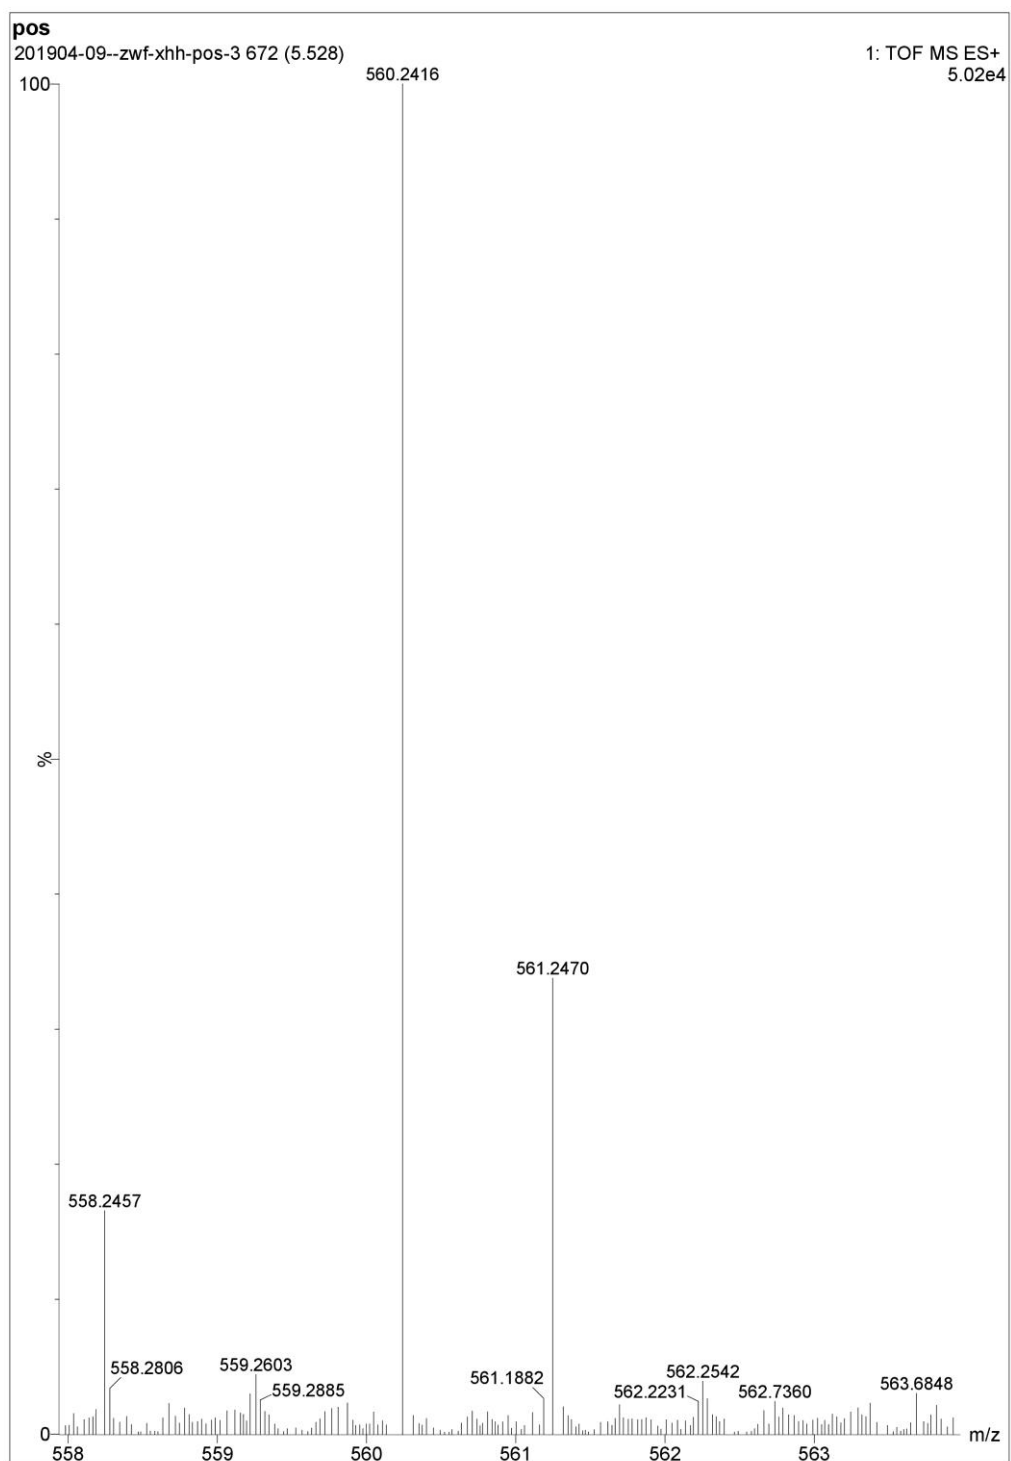

**Figure 20.** TOF MS of compound **B25**.
